# Supplementary material for: Longitudinal profiling of the blood transcriptome in an African green monkey aging model
Source: Aging (Albany NY). 2020 Dec 3;13(1):846–64. doi: 10.18632/aging.202190 (PMC7834999; doi:10.18632/aging.202190)
Supplement: Supplementary Tables 1 and 2 [file aging-13-202190-s002.pdf]

## SUPPLEMENTARY TABLES

**Supplementary Table 1. Sample information used in this study.**

| Species                     | Identical No. | Sex (F/M) | Birth             | 1 <sup>st</sup> year (TP1)<br>Age | 2 <sup>nd</sup> year (TP2)<br>Age | 3 <sup>rd</sup> year (TP3)<br>Age |
|-----------------------------|---------------|-----------|-------------------|-----------------------------------|-----------------------------------|-----------------------------------|
| <i>Chlorocebus aethiops</i> | A009          | M         | February 5, 1991  | 23                                | 24                                | 25                                |
|                             | A014          | F         | April 20, 1992    | 22                                | 23                                | 24                                |
|                             | A017          | F         | August 8, 1992    | 22                                | 23                                | 24                                |
|                             | A022          | F         | November 12, 1993 | 21                                | 22                                | 23                                |
|                             | A023          | F         | December 18, 1993 | 21                                | 22                                | 23                                |
|                             | A024          | F         | March 27, 1994    | 20                                | 21                                | 22                                |
|                             | A026          | F         | June 16, 1994     | 20                                | 21                                | 22                                |
|                             | A028          | F         | August 27, 1995   | 19                                | 20                                | 21                                |
|                             | A030          | M         | October 1, 1999   | 15                                | 16                                | 17                                |

**Supplementary Table 2. Summary of the whole-transcriptome sequencing data used in this study.**

| Sample   | Total read number | Clean reads        | Clean bases   | %<br>≥Q20<br>bases | GC(%)  | Uniquely mapped reads | Mapping rate (%) |
|----------|-------------------|--------------------|---------------|--------------------|--------|-----------------------|------------------|
| A009_TP1 | 45,301,314        | 43,323,392 (95.6%) | 4,332,339,200 | 98.76%             | 55.74% | 36,488,069            | 84.2%            |
| A014_TP1 | 47,470,650        | 45,024,446 (94.8%) | 4,502,444,600 | 98.71%             | 55.90% | 37,676,100            | 83.7%            |
| A017_TP1 | 46,834,102        | 44,680,648 (95.4%) | 4,468,064,800 | 98.77%             | 54.81% | 38,165,871            | 85.4%            |
| A022_TP1 | 46,924,778        | 44,894,386 (95.7%) | 4,489,438,600 | 98.80%             | 54.55% | 39,893,408            | 88.9%            |
| A023_TP1 | 59,568,668        | 56,200,418 (94.3%) | 5,620,041,800 | 98.47%             | 55.45% | 48,230,648            | 85.8%            |
| A024_TP1 | 49,561,172        | 47,576,264 (96.0%) | 4,757,626,400 | 98.81%             | 56.02% | 39,524,017            | 83.1%            |
| A026_TP1 | 51,322,386        | 48,434,668 (94.4%) | 4,843,466,800 | 98.50%             | 53.54% | 41,257,942            | 85.2%            |
| A028_TP1 | 44,904,020        | 42,838,080 (95.4%) | 4,283,808,000 | 98.72%             | 55.15% | 36,417,864            | 85.0%            |
| A030_TP1 | 48,547,742        | 46,015,192 (94.8%) | 4,601,519,200 | 98.59%             | 58.99% | 37,872,906            | 82.3%            |
| A009_TP2 | 57,665,986        | 56,416,626 (97.8%) | 5,698,079,226 | 97.49%             | 56.26% | 52,126,315            | 92.4%            |
| A014_TP2 | 59,140,718        | 57,749,646 (97.6%) | 5,832,714,246 | 97.69%             | 56.76% | 52,795,462            | 91.4%            |
| A017_TP2 | 54,164,580        | 52,825,084 (97.5%) | 5,335,333,484 | 97.32%             | 51.93% | 45,950,900            | 87.0%            |
| A022_TP2 | 54,043,820        | 52,595,934 (97.3%) | 5,312,189,334 | 97.12%             | 54.43% | 46,766,815            | 88.9%            |
| A023_TP2 | 55,098,080        | 53,515,516 (97.1%) | 5,405,067,116 | 97.15%             | 55.58% | 47,224,418            | 88.2%            |
| A024_TP2 | 62,305,174        | 60,598,090 (97.3%) | 6,120,407,090 | 97.23%             | 54.68% | 54,512,504            | 90.0%            |
| A026_TP2 | 60,312,888        | 58,368,442 (96.8%) | 5,895,212,642 | 96.91%             | 51.75% | 50,263,252            | 86.1%            |
| A028_TP2 | 58,472,078        | 56,823,852 (97.2%) | 5,739,209,052 | 97.24%             | 55.50% | 50,034,000            | 88.1%            |
| A030_TP2 | 54,537,530        | 52,875,002 (97.0%) | 5,340,375,202 | 97.16%             | 55.24% | 47,169,159            | 89.2%            |
| A009_TP3 | 58,391,966        | 57,430,426 (98.4%) | 5,800,473,026 | 97.94%             | 56.96% | 50,712,008            | 88.3%            |
| A014_TP3 | 43,120,278        | 42,268,894 (98.0%) | 4,269,158,294 | 97.82%             | 55.95% | 37,376,907            | 88.4%            |
| A017_TP3 | 50,063,882        | 49,285,080 (98.4%) | 4,977,793,080 | 97.99%             | 55.34% | 43,765,097            | 88.8%            |
| A022_TP3 | 58,666,010        | 57,690,134 (98.3%) | 5,826,703,534 | 97.89%             | 56.70% | 50,868,104            | 88.2%            |
| A023_TP3 | 51,392,162        | 50,689,146 (98.6%) | 5,119,603,746 | 97.28%             | 55.87% | 44,505,333            | 87.8%            |
| A024_TP3 | 51,849,460        | 51,032,314 (98.4%) | 5,154,263,714 | 97.97%             | 57.34% | 45,655,035            | 89.5%            |
| A026_TP3 | 52,834,220        | 52,040,756 (98.5%) | 5,256,116,356 | 97.24%             | 54.81% | 45,127,840            | 86.7%            |
| A028_TP3 | 50,839,704        | 50,039,096 (98.4%) | 5,053,948,696 | 97.98%             | 56.48% | 44,695,945            | 89.3%            |
| A030_TP3 | 59,264,442        | 58,377,208 (98.5%) | 5,896,098,008 | 98.00%             | 57.34% | 52,561,099            | 90.0%            |
